# Supplementary material
Source: HighWire-hosted journal article supplement (https://bmjopen.bmj.com/content/11/12/e047690)
Supplement: inline-supplementary-material-2 [file inline-supplementary-material-2.pdf]

## 伦理审查批件

## (临床医学研究)

批件号：中大附三医伦[2020]02-173-01

|         |                                                                                                    |
|---------|----------------------------------------------------------------------------------------------------|
| 项目名称    | 人工肝双重血浆分子吸附系统联合半量血浆置换在乙型肝炎慢加急性肝衰竭安全性和有效性的前瞻性、多中心、随机对照临床研究                                          |
| 申办方     | 彭亮                                                                                                 |
| 本院承担科室  | 感染性疾病科                                                                                             |
| 本院项目负责人 | 彭亮                                                                                                 |
| 项目来源    | 研究者自发                                                                                              |
| 经费来源    | 研究者自筹                                                                                              |
| 审查类别    | <input checked="" type="checkbox"/> 初始审查 <input type="checkbox"/> 跟踪审查 <input type="checkbox"/> 复审 |
| 审查方式    | <input checked="" type="checkbox"/> 会议审查， 日期：2020 年 09 月 23 日 地点：中山大学附属第三医院综合楼 2006 会议室            |
| 审查文件    | 详见附件                                                                                               |

## 审查意见：

根据我国国家卫生计生委《涉及人的生物医学研究伦理审查办法》（2016 年），国家食品药品监督管理局《药物临床试验质量管理规范》（2020 年），《医疗器械临床试验规定》（2004 年），《药物临床试验伦理审查工作指导原则》（2010 年），（2007 年），国家卫生计生委、国家食品药品监督管理局《干细胞临床研究管理办法（试行）》（2015 年）等法规、政策与指南的规定，以及 WMA《赫尔辛基宣言》、ICH-GCP 和 CIOMS《人体生物医学研究国际道德指南》的伦理原则，经本伦理委员会审查，意见如下：

批准在本中心按所同意的临床研究方案、知情同意书开展本项研究。

- ◆ 请遵循ICH-GCP及中国GCP原则、遵循伦理委员会批准的方案开展临床研究，保护受试者的健康与权利。
- ◆ 属于国际合作项目，请按照《人类遗传资源管理暂行办法》及《科技部关于进一步加强人类遗传资源管理工作的通知》要求，须在取得人类遗传资源采集、收集、买卖、出口、出境审批书后方可实施临床研究，并将审批书报备伦理委员会。
- ◆ 研究过程中若变更项目负责人，对临床研究方案、知情同意书、招募材料等的任何修改，请申请人提交修正案审查申请。
- ◆ 发生严重不良反应或严重不良事件，请申请人及时提交严重不良反应或严重不良事件报告。
- ◆ 请按照伦理委员会规定的年度/定期跟踪审查频率，申请人在截止日期前1个月提交研究进展报告；申办者应当向组长单位伦理委员会提交各中心研究进展的汇总报告；当出现任何可能显著影响研究进行、或增加受试者危险的情况时，请申请人及时向伦理委员会提交书面报告。
- ◆ 研究纳入了不符合纳入标准或符合排除标准的受试者，符合中止研究规定而未让受试者退出研究，给予错误治疗或剂量，给予方案禁止的合并用药等没有遵从方案开展研究的情况；或可能对受试者的权益/健康以及研究的科学性造成不良影响等违背GCP原则的情况，请申办者/监察员/研究者提交违背方案报告。

第 1 页，共 2 页

联系地址：广东省广州市天河路 600 号 邮编：510630 联系人：黄凯琪 联系电话（传真）：85252131  
Address: 600# Tian He Road, Guangzhou, P. R. China 510630 Tel (Fax): 85253048



- ◆ 申请人暂停或提前终止临床研究，请及时提交暂停/终止研究报告。
  - ◆ 完成临床研究，请申请人提交研究完成报告。
  - ◆ 本批件有效期1年（自批准之日起），在有效期内未实施开展的，需重新提交伦理委员会审查后再开展研究。
- 本伦理委员会的职责、人员组成和工作程序符合 ICH-GCP、中国 GCP 原则及国家法律法规及规章等相关文件。

年度/定期跟踪审查频率：12 个月，截止日期：2021 年 09 月 28 日

主任/副主任签字：

日期：2020 年 09 月 29 日

伦理委员会（盖章）：中山大学附属第三医院医学伦理委员会

附件（审查文件）：

批准文件

1. 研究方案（版本号 1.0，日期：2020 年 07 月 21 日）
2. 知情同意书（版本号 1.0，日期：2020 年 07 月 21 日）

审阅文件：

1. 临床医学研究项目立项申请表
2. 临床医学研究伦理初始审查申请表
3. 临床医学研究伦理初始审查自查表
4. 研究经济利益声明（研究者）
5. 研究项目负责人专业履历
6. 病例报告表（版本号 1.0，日期：2020 年 07 月 21 日）
7. 研究用品资质证明

第 2 页，共 2 页

联系地址：广东省广州市天河路 600 号 邮编：510630 联系人：黄凯琪 联系电话（传真）：85252131  
Address: 600# Tian He Road, Guangzhou, P. R. China 510630 Tel (Fax): 85253048
